# Supplementary material for: Hypercrosslinked phenothiazine-based polymers as high redox potential organic cathode materials for lithium-ion batteries
Source: Royal Society of Chemistry journal article supplement (doi:10.1039/d0ra01312a), 2020-01-01
Supplement: d0ra01312a1.pdf [file d0ra01312a1.pdf]

## Supporting Information

### Hypercrosslinked phenothiazine-based polymers as high redox potential organic cathode materials for lithium-ion batteries

Ying Zhang,<sup>a</sup> Panpan Gao,<sup>a</sup> Xinya Guo,<sup>a</sup> Han Chen,<sup>a</sup> Ruiqiang Zhang,<sup>a</sup> Ya Du<sup>\*b</sup>, Baofeng Wang<sup>\*a</sup> and Haishen Yang<sup>\*a</sup>

a. Shanghai Key Laboratory of Materials Protection and Advanced Materials in Electric Power, College of Environmental and Chemical Engineering, Shanghai University of Electric Power, Shanghai 200090, China. E-mail: yanghsh@shiep.edu.cn; wangbaofeng@shiep.edu.cn

b. Institute of Advanced Synthesis, School of Chemistry and Molecular Engineering, Nanjing Tech University, Nanjing 211816, China. E-mail: ias\_ydu@njtech.edu.cn

#### Experimental Section

**Reagents and Instrumentation:** Phenothiazine (98%), iodomethane (CH<sub>3</sub>I, 99%), sodium hydride (NaH, 60%), *N*-bromosuccinimide (NBS, 99%), *N,N*-dimethylformamide (DMF, 99.5%), bis(triphenylphosphine)palladium(II) dichloride (Pd(PPh<sub>3</sub>)<sub>2</sub>Cl<sub>2</sub>, 98%), copper(I) iodide (CuI, 99%), trimethylsilylacetylene (TMSA, 95%), triethylamine (TEA, 99%), potassium carbonate (K<sub>2</sub>CO<sub>3</sub>, 99%), methanol (MeOH, 99.5%), octacarbonyldicobalt (Co<sub>2</sub>(CO)<sub>8</sub>, 95%), 1,3,5-tribromobenzene (98%) and other solvents were purchased analytical grade. Tetrahydrofuran (THF, 99%) and 1,4-dioxane (99%) were purified by distillation prior to use. The prepared compounds were confirmed by nuclear magnetic resonance (NMR) using a 400 MHz Bruker. Fourier Transform infrared spectroscopy (FT-IR) spectra were recorded on PerkinElmer Spectrum Two. Elemental analysis (EA) was collected using a Vario EL cube. The specific surface areas were analyzed by Brunauer-Emmett-Teller (BET, Autosorb-iQ3). X-ray diffraction (XRD) was conducted on Bruker D8 Advance. Thermal gravimetric analysis (TGA) was carried out using a NETZSCH STA 409 PC/PG apparatus. Scanning electron microscopes (SEM) is measured on JEOL JSM-7810F.

#### Synthesis of 10-methyl-10*H*-phenothiazine (**1-1**)<sup>1</sup>

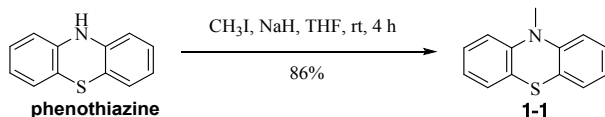

Phenothiazine (5 g, 25 mmol), anhydrous THF (125 mL) and sodium hydride (2 g, 50 mmol) were slowly added to a two-necked flask, and then the mixture was stirred for 2 h at room temperature. Afterwards methyl iodide (14 g, 0.1 mol) was added. The mixture was continued stirred for 2 h at room temperature. After cooling, the mixture was poured into water (100 mL) and extracted with dichloromethane (150 mL). The organic layer was separated and evaporated to dryness under vacuum. The crude product was recrystallized from petroleum ether to obtain compound **1-1**, white solid 4.6 g (yield: 86%). <sup>1</sup>H NMR (400 MHz, CDCl<sub>3</sub>): δ 7.20 – 7.13 (m, 4H), 6.93 (dt, *J* = 7.5, 1.2 Hz, 2H), 6.82 (dd, *J* = 8.1, 1.1 Hz, 2H), 3.38 (s, 3H). The <sup>1</sup>H NMR data is consistent with the literature report.<sup>2</sup>

### Synthesis of 3,7-dibromo-10-methyl-10*H*-phenothiazine (**1-2**)<sup>3</sup>

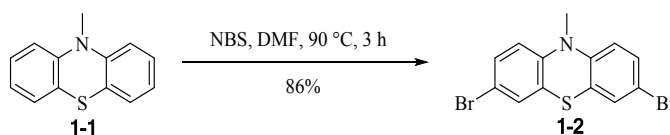

Compound **1-1** (0.2 g, 0.9 mmol), NBS (0.4 g, 2 mmol) were dissolved in DMF (1 mL). The solution was stirred in the dark for 3 h at 90 °C. After cooling, water (20 mL) was added, and the mixture was extracted with dichloromethane (3 × 20 mL). The organic layers were separated and evaporated to dryness under vacuum. The crude product was column chromatographed over silica gel (200-300 mesh, petroleum ether/dichloromethane: 10/1) afforded compound **1-2**, a white solid 0.3 g (yield: 86%). <sup>1</sup>H NMR (400 MHz, CDCl<sub>3</sub>): δ 7.27 (d, *J* = 2.3 Hz, 1H), 7.25 (d, *J* = 2.3 Hz, 1H), 7.23 (d, *J* = 2.2 Hz, 2H), 6.65 (d, *J* = 8.5 Hz, 2H), 3.31 (s, 3H). The <sup>1</sup>H NMR data is consistent with the literature report.<sup>4</sup>

### Synthesis of 10-methyl-3,7-bis[2-(trimethylsilyl)ethynyl]-10*H*-phenothiazine (**1-3**)<sup>5, 6</sup>

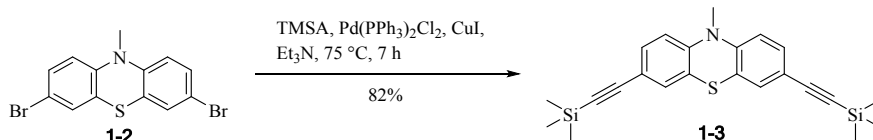

Compound **1-2** (0.2 g, 0.5 mmol), Pd(PPh<sub>3</sub>)<sub>2</sub>Cl<sub>2</sub> (19 mg, 0.027 mmol) and CuI (5 mg, 0.027 mmol) were charged into a 10 mL Schlenk tube and degassed three times. Then, TMSA (122 mg, 1.24 mmol) and anhydrous Et<sub>3</sub>N (1.5 mL) were added to this tube. The resulting mixture was stirred at 75 °C for 7 h. After cooling, the mixture was poured into dichloromethane (50 mL). The organic phase was washed twice with saturated solution of NH<sub>4</sub>Cl, and once with brine. The organic phase was separated and evaporated to dryness under vacuum. The crude product was column chromatographed over silica gel (200-300 mesh, petroleum ether/dichloromethane: 10/1) afforded compound **1-3**, a yellow solid 0.18 g (yield: 82%). <sup>1</sup>H NMR (400 MHz, CDCl<sub>3</sub>): δ 7.24 (d, *J* = 1.9 Hz, 1H), 7.20 (d, *J* = 1.9 Hz, 2H), 6.68 (d, *J* = 8.4 Hz, 2H), 3.34 (s, 3H), 0.23 (s, 18H). The <sup>1</sup>H NMR data is consistent with the literature report.<sup>4</sup>

### Synthesis of 3,7-diethynyl-10-methyl-10*H*-phenothiazine (**1**)<sup>7</sup>

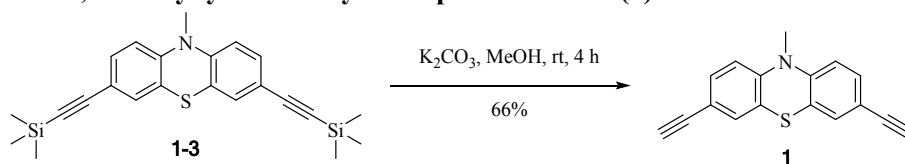

Compound **1-3** (0.3 g, 0.75 mmol), K<sub>2</sub>CO<sub>3</sub> (0.6 g, 4.5 mmol), dichloromethane (4 mL) and methanol (8 mL) were charged into a round bottom flask and stirred at room temperature for 4 h. Afterwards, water (20 mL) and dichloromethane (20 mL) were added. The organic phase was separated and washed with water (2 × 20 mL) and evaporated to dryness under vacuum. The crude products were recrystallized from petroleum ether to obtain compound **1**, a pale yellow solid 0.13 g (yield: 66%). <sup>1</sup>H NMR (400 MHz, CDCl<sub>3</sub>): δ 7.29 (dd, *J* = 8.3, 1.9 Hz, 2H), 7.23 (d, *J* = 1.9 Hz, 2H), 6.72 (d, *J* = 8.4 Hz, 2H), 3.36 (s, 3H), 3.05 (s, 2H). The <sup>1</sup>H NMR data is consistent with the literature report.<sup>4</sup>

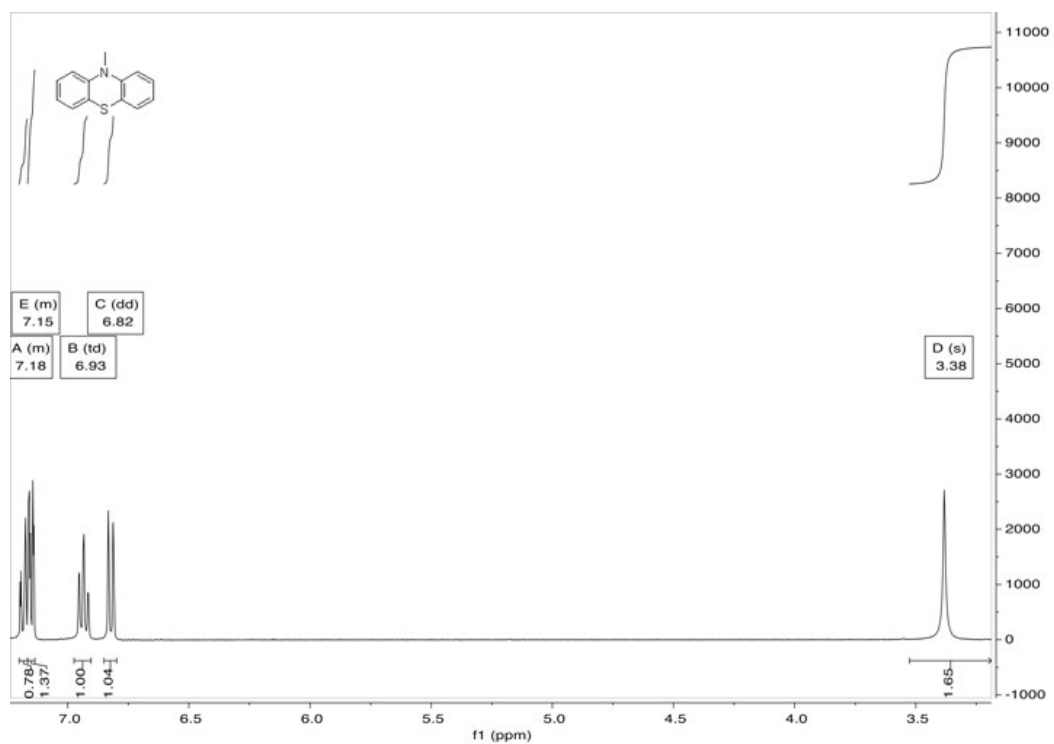

Fig. S1 400 MHz  $^1\text{H}$  NMR spectra of compound 1-1 in  $\text{CDCl}_3$ .

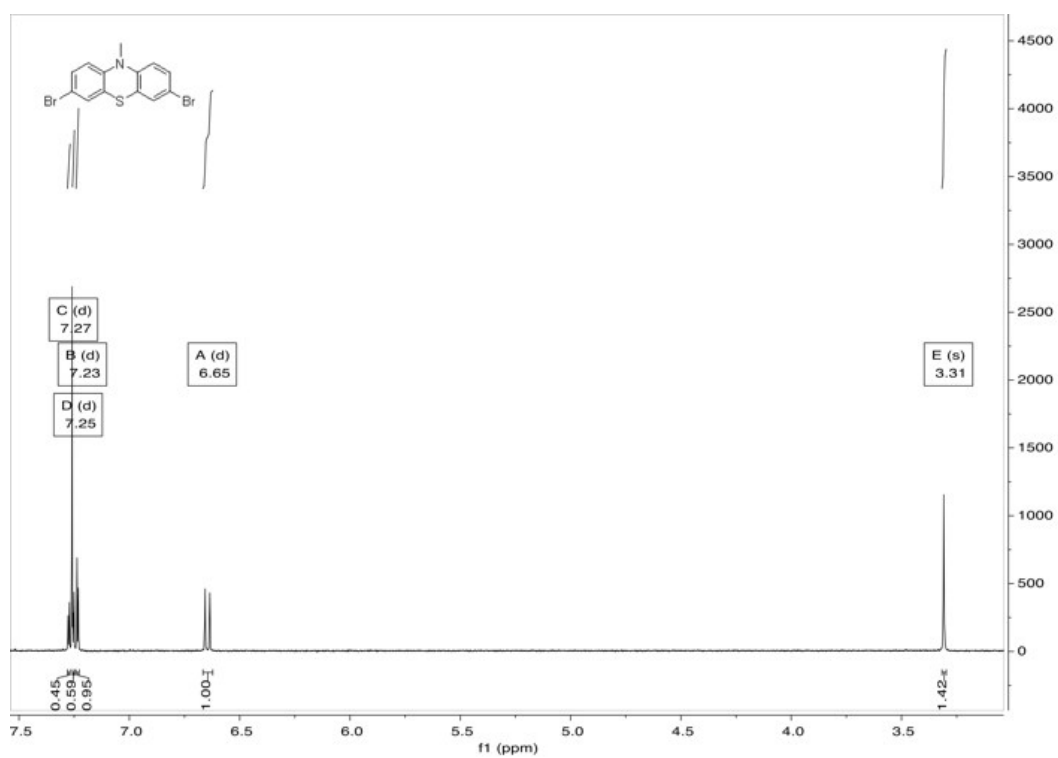

Fig. S2 400 MHz  $^1\text{H}$  NMR spectra of compound 1-2 in  $\text{CDCl}_3$ .

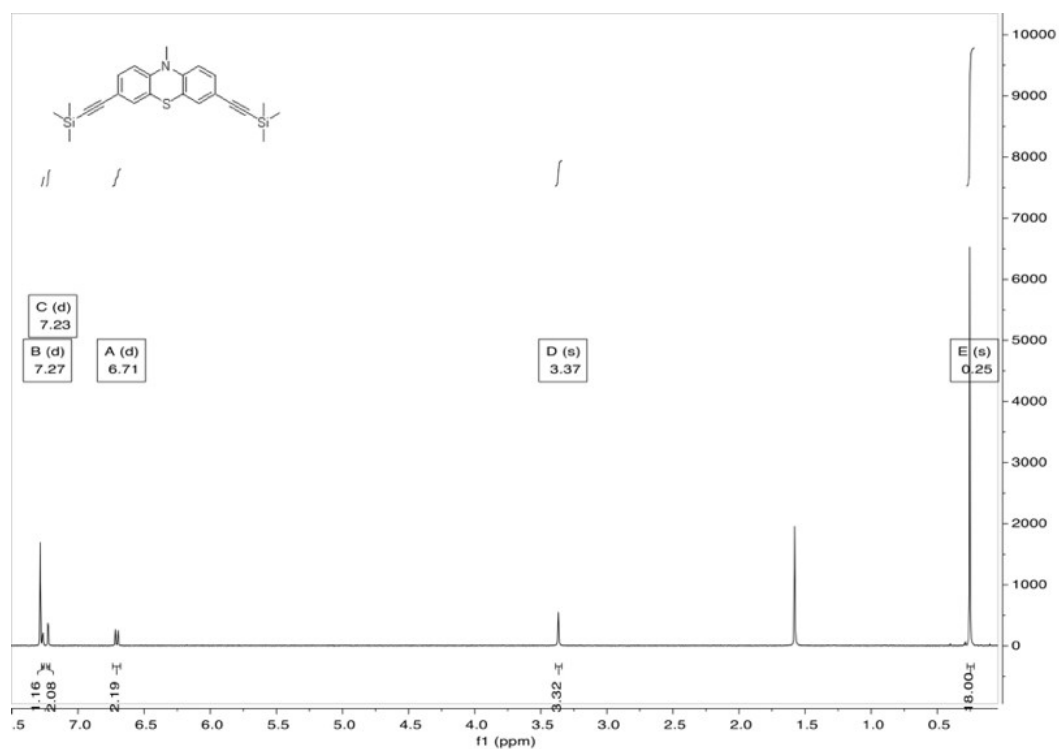

Fig. S3 400 MHz  $^1\text{H}$  NMR spectra of compound 1-3 in  $\text{CDCl}_3$ .

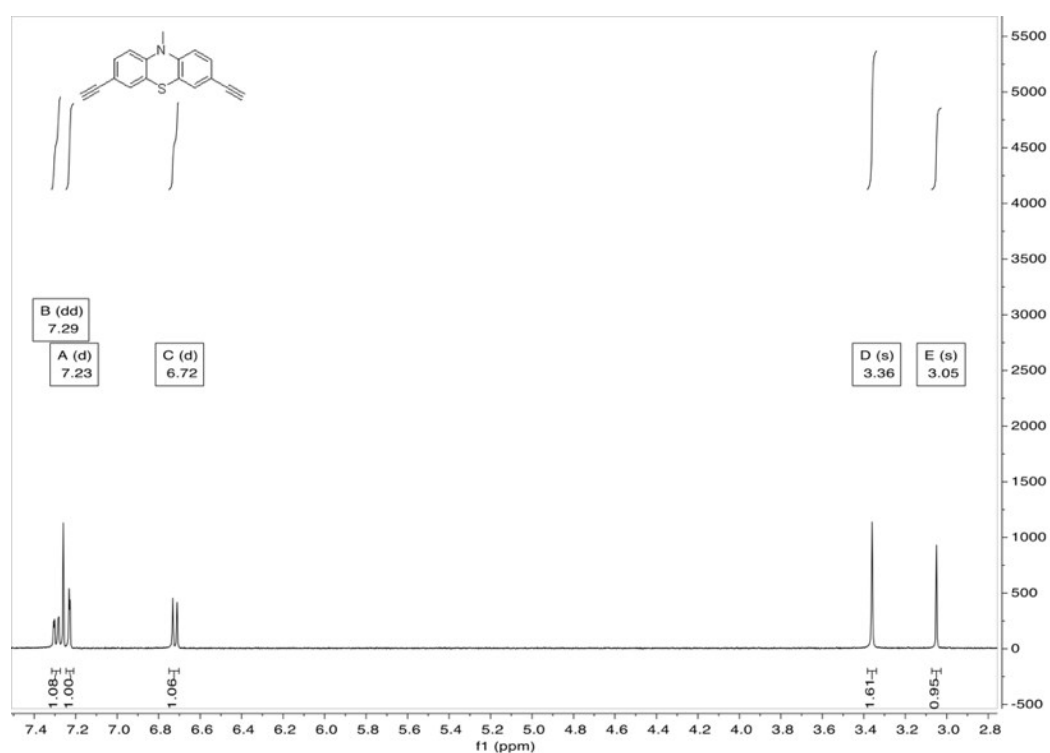

Fig. S4 400 MHz  $^1\text{H}$  NMR spectra of compound 1 in  $\text{CDCl}_3$ .

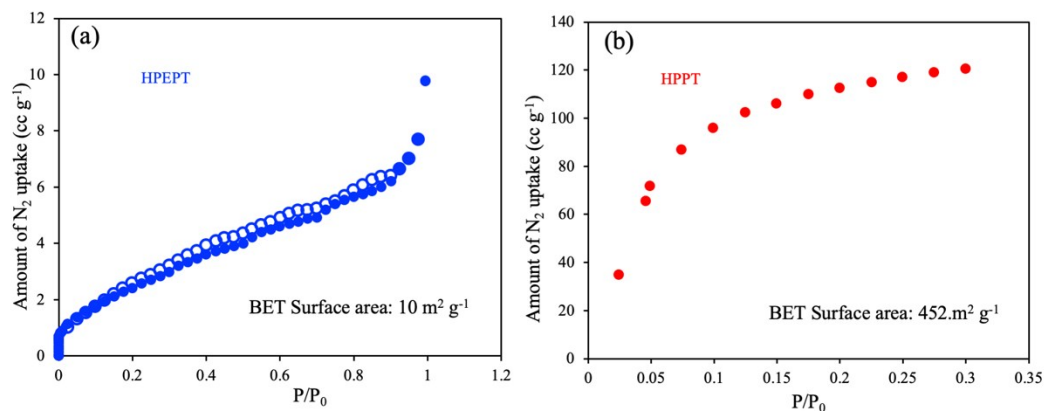

**Fig. S5** (a)  $N_2$  adsorption and desorption isotherms of **HPEPT**; (b)  $N_2$  adsorption isotherm of **HPPT**.

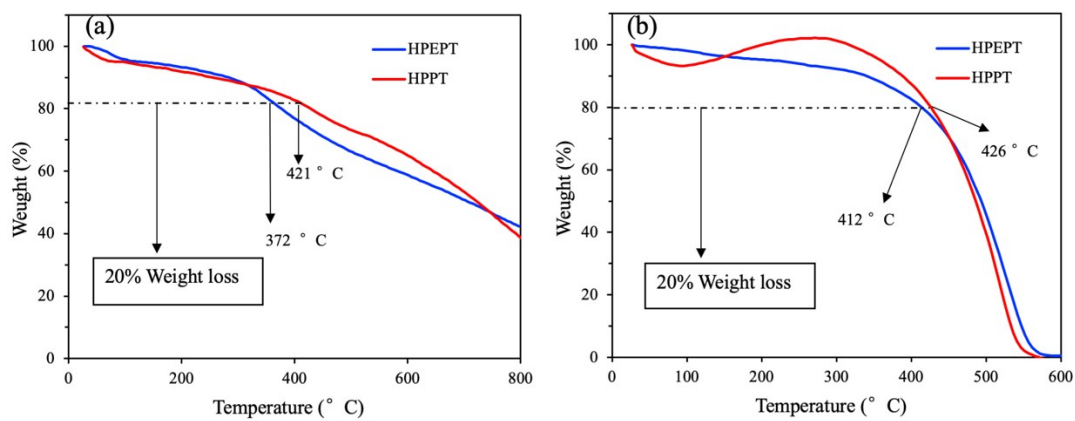

**Fig. S6** (a) TGA curves of **HPEPT** and **HPPT** in  $N_2$  atmosphere at a heating rate of 10 °C min<sup>-1</sup>; (b) TGA curves of **HPEPT** and **HPPT** in air at a heating rate of 10 °C min<sup>-1</sup>.

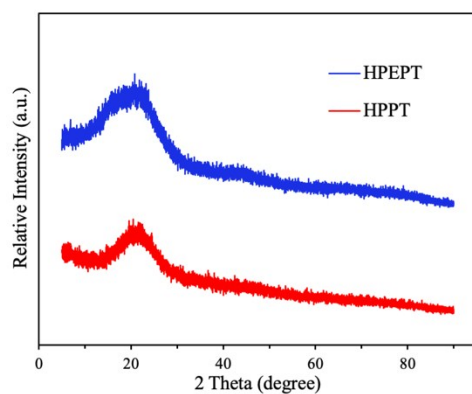

**Fig. S7** XRD spectra of **HPEPT** and **HPPT**.

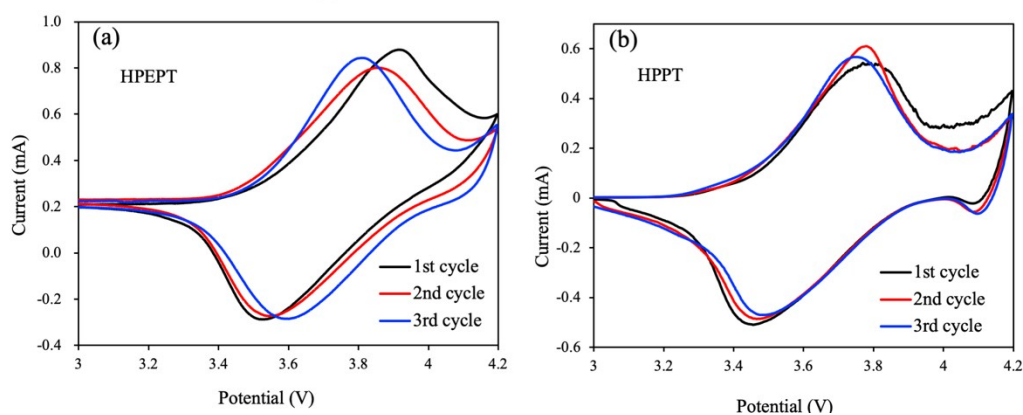

**Fig. S8** (a) CV curves of **HPEPT** at a scan rate of  $1 \text{ mV s}^{-1}$  in the voltage range of 3–4.2 V vs  $\text{Li/Li}^+$ ; (b) CV curves of **HPPT** at a scan rate of  $1 \text{ mV s}^{-1}$  in the voltage range of 3–4.2 V.

## References

- 1 R. Krishna, V. Kurshev and L. Kevan, *Phys. Chem. Chem. Phys.*, 1999, **1**, 2833–2839.
- 2 T. Godet-Bar, J. C. Lepretre, O. Le Bacq, J. Y. Sanchez, A. Deronzier and A. Pasturel, *Phys. Chem. Chem. Phys.*, 2015, **17**, 25283–25296.
- 3 R. M. Pearson, C. H. Lim, B. G. McCarthy, C. B. Musgrave and G. M. Miyake, *J. Am. Chem. Soc.*, 2016, **138**, 11399–11407.
- 4 C. S. Krämer and T. J. J. Müller, *Eur. J. Org. Chem.*, 2003, **18**, 3534–3548.
- 5 A. Arnanz, C. Moreno, M.-L. Marcos, J. González-Velasco and S. Delgado, *Eur. J. Inorg. Chem.*, 2007, **2007**, 5215–5225.
- 6 Q. Chen, Y. Ma, C. Wang and Y. Shen., *Chin. J. Org. Chem.*, 2012, **32**, 1526–1532.
- 7 P. K. Mandali and D. K. Chand, *Catal. Commun.*, 2014, **47**, 40–44.
